# Supplementary material for: Antiviral Effects of Black Raspberry (Rubus coreanus) Seed and Its Gallic Acid against Influenza Virus Infection
Source: Viruses. 2016 Jun 6;8(6):157. doi: 10.3390/v8060157 (PMC4926177; doi:10.3390/v8060157)

# Supplementary Materials: Antiviral Effects of Black Raspberry (*Rubus coreanus*) Seed and its Gallic Acid against Influenza Virus Infection

Ji-Hye Lee, Mi Oh, Jong Hyeon Seok, Sella Kim, Dan Bi Lee, Garam Bae, Hae-In Bae, Seon Young Bae, Young-Min Hong, Sang-Oh Kwon, Dong-Hun Lee, Chang-Seon Song, Ji Young Mun, Mi Sook Chung and Kyung Hyun Kim

**Table S1.** Multiple reaction monitoring conditions of polyphenols from RCSF1.

| Analyte                    | Retention Time (min) | Exact Mass | Ionization           | Precursor | Product 1 | Collision Energy (V) | Product 2 | Collision Energy (V) |
|----------------------------|----------------------|------------|----------------------|-----------|-----------|----------------------|-----------|----------------------|
| Caffeic acid               | 4.29                 | 180.04     | [M – H] <sup>–</sup> | 179       | 135       | 16                   | 134       | 25                   |
| Catechin                   | 3.96                 | 290.08     | [M + H] <sup>+</sup> | 291       | 139       | –15                  | 123       | –16                  |
| Chlorogenic acid           | 4.07                 | 354.10     | [M – H] <sup>–</sup> | 353       | 191       | 16                   | 85        | 45                   |
| <i>p</i> -Coumaric acid    | 5.20                 | 164.05     | [M – H] <sup>–</sup> | 163       | 119       | 15                   | 93        | 31                   |
| Cyanidin-3-glucoside       | 3.74                 | 448.10     | [M + H] <sup>+</sup> | 449       | 287       | –22                  | 137       | –55                  |
| Cyanidin-3-rutinoside      | 3.97                 | 594.16     | [M + H] <sup>+</sup> | 595       | 287       | –31                  | 449       | –20                  |
| 3,4-Dihydroxybenzoic acid  | 2.09                 | 154.03     | [M – H] <sup>–</sup> | 153       | 109       | 16                   | 108       | 25                   |
| Ellagic acid               | 5.51                 | 302.01     | [M – H] <sup>–</sup> | 301       | 145       | 38                   | 284       | 29                   |
| Epigallocatechin gallate   | 4.77                 | 458.08     | [M – H] <sup>–</sup> | 457       | 169       | 21                   | 125       | 38                   |
| <i>trans</i> -Ferulic acid | 5.67                 | 194.06     | [M – H] <sup>–</sup> | 193       | 134       | 15                   | 178       | 15                   |
| Gallic acid                | 1.02                 | 170.02     | [M – H] <sup>–</sup> | 169       | 125       | 16                   | 79        | 23                   |
| Myricetin                  | 6.74                 | 318.04     | [M – H] <sup>–</sup> | 317       | 151       | 25                   | 179       | 18                   |
| Quercetin                  | 7.78                 | 302.04     | [M + H] <sup>+</sup> | 303       | 153       | –32                  | 137       | –31                  |
| <i>trans</i> -Resveratrol  | 7.06                 | 228.08     | [M + H] <sup>+</sup> | 229       | 107       | –25                  | 135       | –15                  |
| Rutin                      | 5.68                 | 610.15     | [M – H] <sup>–</sup> | 609       | 300       | 40                   | 301       | 33                   |

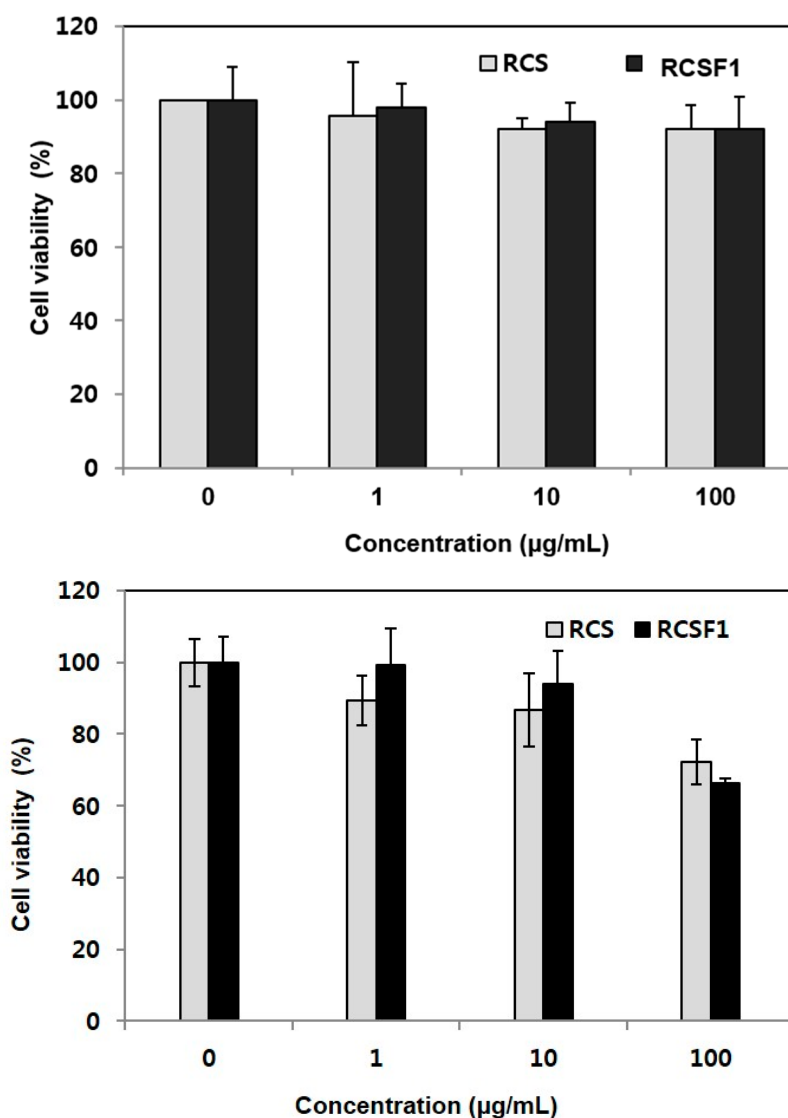

**Figure S1.** Cytotoxicity of RCS and RCSF1. Cytotoxicities of RCS and RCSF1 were measured by MTT assay. MDCK cells were treated with RCS or RCSF1 for 24 h (**upper panel**) and 48 h (**lower panel**). The percentage of cell viability was calculated as follows: % cell viability = (Abs<sub>treatment</sub> / Abs<sub>control</sub>) × 100.

### Pre-virus treatment

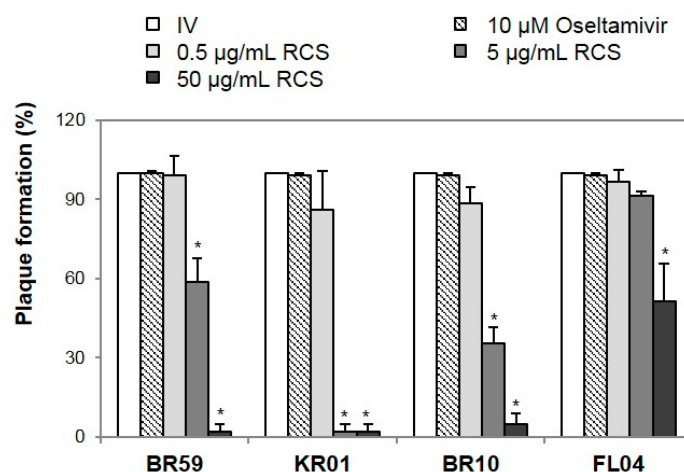

**Figure S2.** Cont.

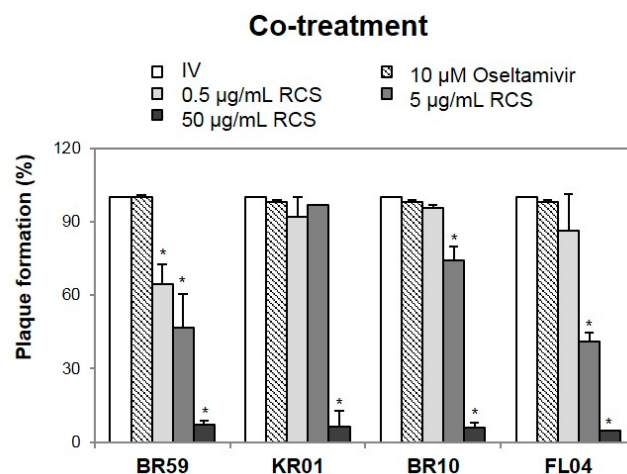

**Figure S2.** Antiviral activities of RCS against BR59, KR01, BR10, and FL04. In time-of-addition assays, pre-virus treatment (**upper panel**): each virus was mixed with RCSF1 for 1 h prior to viral infection. Co-treatment (**lower panel**): cells were infected with virus and simultaneously treated with RCS for 1 h at 37 °C. After infection, the cell monolayers were washed with PBS and overlaid with DMEM and agarose at 37 °C for 72 h. Plaques were counted after 0.5% crystal violet staining. Non-treated influenza virus (IV) and oseltamivir (10 µM) were used as negative and positive controls, respectively. All measurements were performed in triplicate. An asterisk (\*) denotes a significant decrease in plaque formation relative to the control ( $p < 0.05$ ).

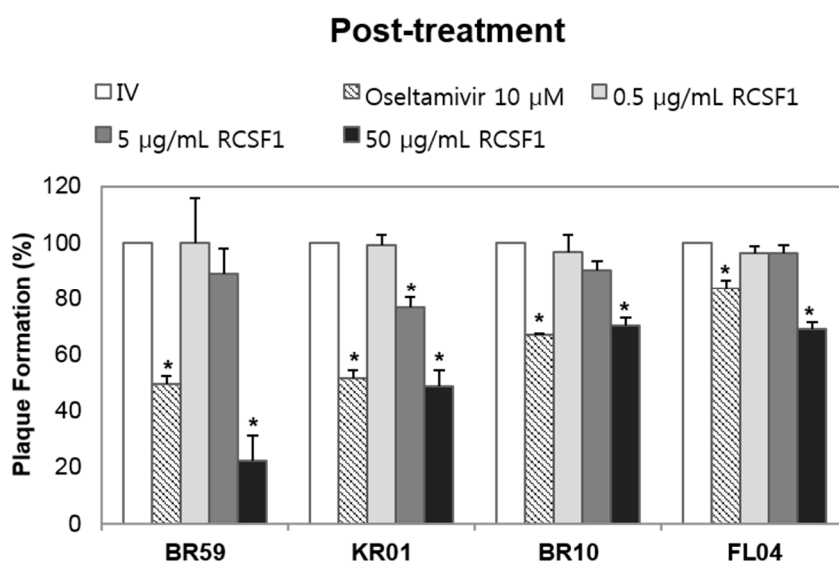

**Figure S3.** Antiviral activities of RCSF1 against BR59, KR01, BR10, and FL04 in the post-treatment. For post-treatment, virus was absorbed to cells at 37 °C for 1 h, which were treated with RCSF1 for 1 h and overlaid with DMEM containing trypsin and agarose for 72 h. Plaques were counted after crystal violet staining. Non-treated influenza virus (IV) and oseltamivir (10 µM) were used as negative and positive controls, respectively. All measurements were performed in triplicate. An asterisk (\*) denotes a significant decrease in plaque formation relative to the control ( $p < 0.05$ ).

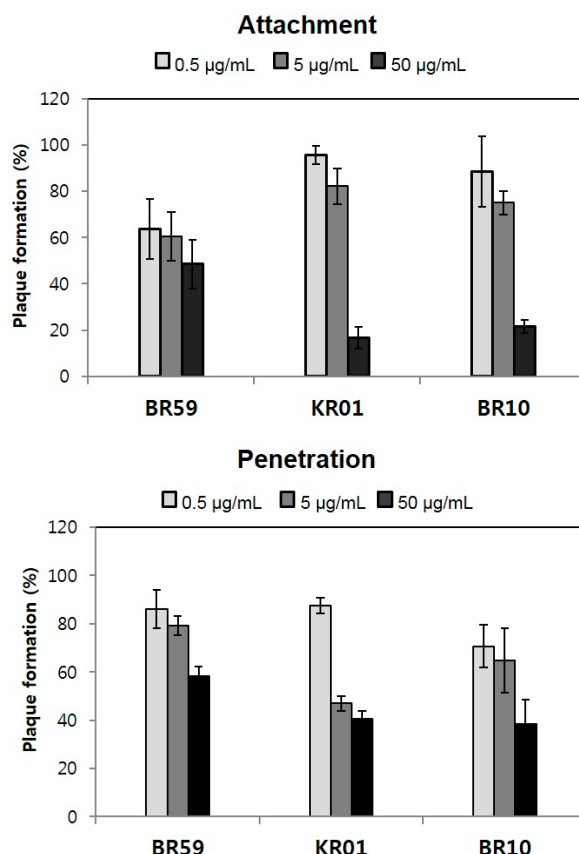

**Figure S4.** Inhibitory effects of RCSF1 on attachment or penetration into host cells. For attachment assay (**upper panel**), chilled MDCK cells were infected with virus and simultaneously treated with RCSF1 (0.5–50 µg/mL) for 1 h at 4 °C. After infection, the supernatant was removed and cells were washed twice with ice-cold PBS. For penetration assay (**lower panel**), chilled MDCK cells were infected with virus at 4 °C for 1 h. MDCK cells were treated with RCSF1 (0.5–50 µg/mL) at 37 °C for 1 h. After the supernatant was removed, un-penetrated virus was inactivated by acidic PBS (pH 3) and neutralized with alkaline PBS (pH 11) and washed with ice-cold PBS. Cells were overlaid with DMEM containing TPCK-trypsin and agarose for 72 h at 37 °C, 5% CO<sub>2</sub>. Plaques were counted after 0.5% crystal violet staining. The plaque formation of influenza virus-infected MDCK cells was 100%. All measurements were performed in triplicate.

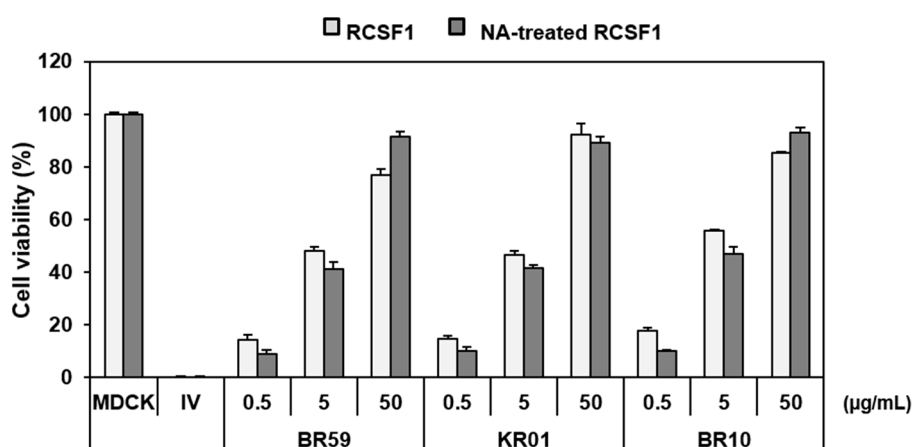

**Figure S5.** Effect of NA treatment on RCSF1. MDCK cells were infected with virus at an MOI of 0.001 for 1 h at 37 °C. After removing the medium, the cells were treated with RCSF1 or NA-treated RCSF1 (1 unit NA per 1 µg RCSF1) which was serially diluted in DMEM containing trypsin. After incubation for 72 h at 37 °C and 5% CO<sub>2</sub>, the cell viability was measured using MTT assay.

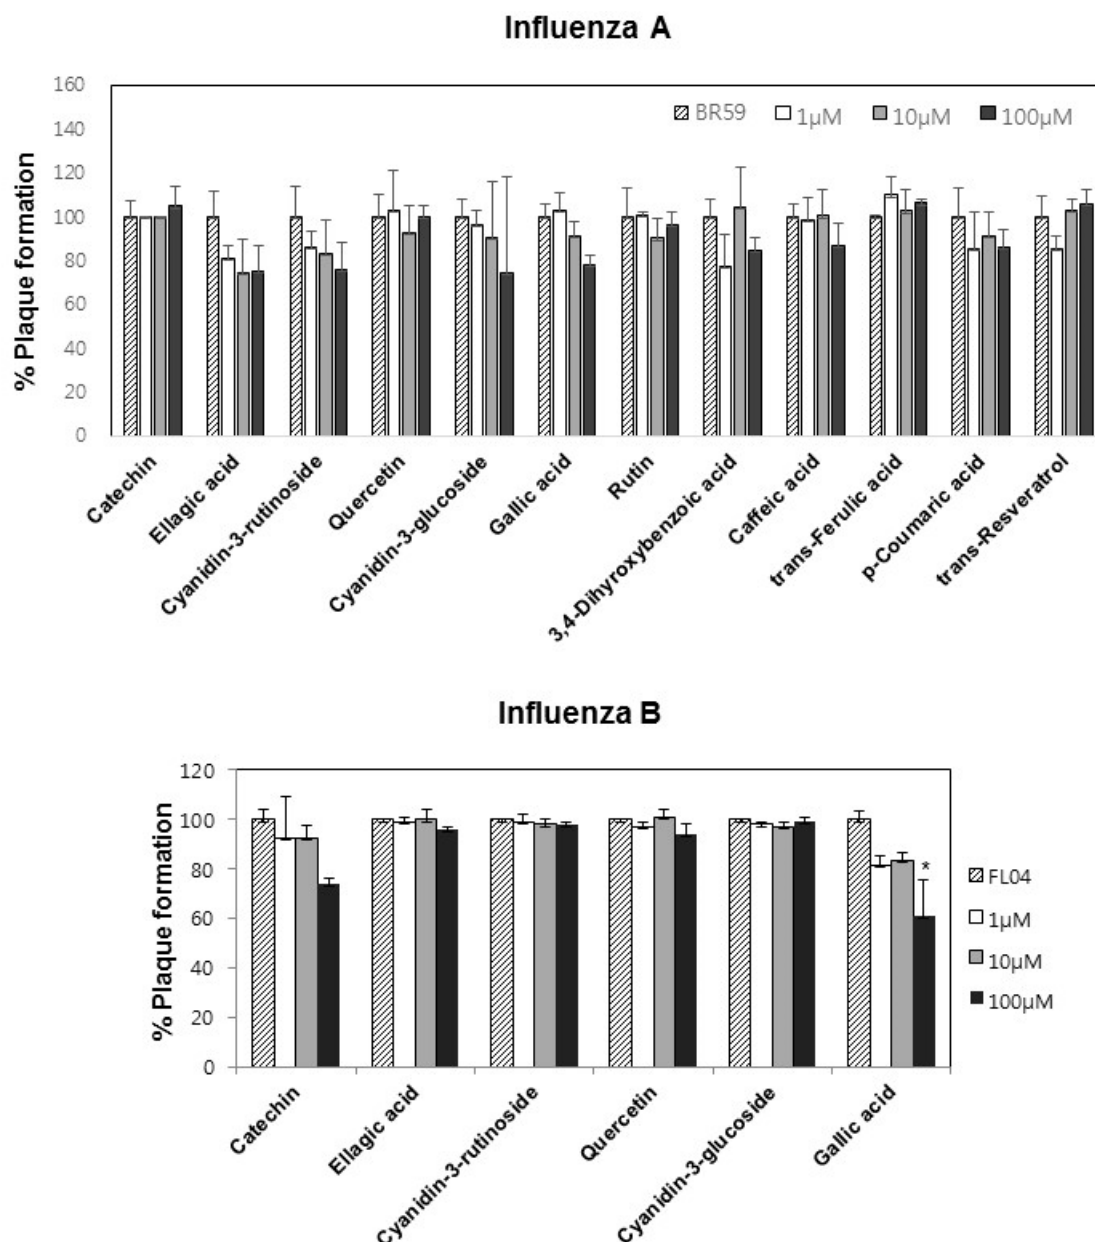

**Figure S6.** Antiviral activities polyphenols against influenza type A and B in the co-treatment. Cells were infected with virus and simultaneously treated with polyphenol for 1 h at 37 °C. After infection, the cells were washed with PBS and overlaid with DMEM and agarose at 37 °C for 2–3 d. Plaques were counted after crystal violet staining. Non-treated influenza virus (IV) and oseltamivir (10 µM) were used as negative and positive controls, respectively. Co-treatment with oseltamivir exhibited no inhibition against influenza type A and B. All measurements were performed in triplicate. An asterisk (\*) denotes a significant decrease in plaque formation relative to the non-treated influenza virus ( $p < 0.05$ ).

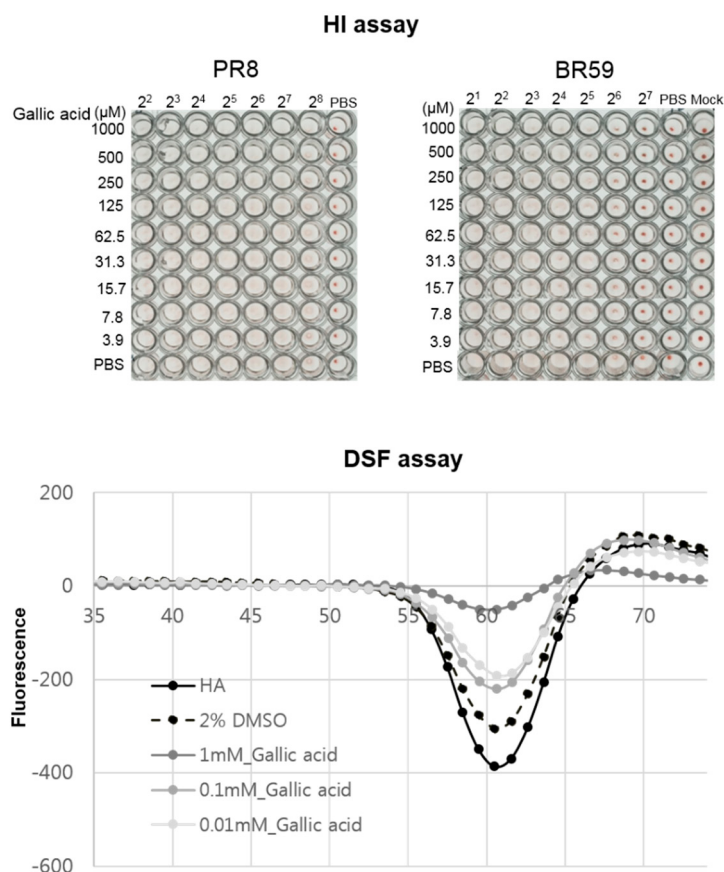

**Figure S7.** Effects of gallic acid on hemagglutination and binding to hemagglutinin. For HI assay (upper panel), gallic acid (3.9–1000 μM) was incubated with 2-fold serial diluted virus and chicken red blood cells for 1 h before hemagglutination inhibition was determined. For DSF assay (lower panel), the melting temperature  $T_m$  profile of influenza virus HA in the absence and presence of gallic acid (0.01–1 mM) was measured.

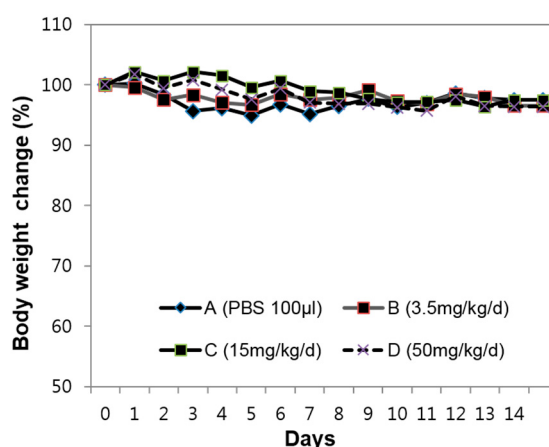

**Figure S8.** *In vivo* toxicity of RCSF1. Six-week-old BALB/c mice (five per group) were orally treated with RCSF1 at doses of 0, 3.5, 15, and 50 mg/kg/day for 8 days. Body weight changes of mice were measured daily for 14 days.

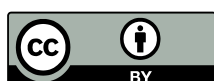

Supplement: Supplementary file 1 [file viruses-08-00157-s001.pdf]
